# Supplementary material for: Folic acid ameliorates depression-like behaviour in a rat model of chronic unpredictable mild stress
Source: BMC Neurosci. 2020 Jan 15;21:1. doi: 10.1186/s12868-020-0551-3 (PMC6961331; doi:10.1186/s12868-020-0551-3)
Supplement: Supplementary file 3 — Additional file 3. Data for Fig. 4. The levels of monoamine neurotransmitter in serum and brains of CUMS rats in different group during the experiment. Serum 5-HT (A), DA (B) and NE (C) were detected on 6th and 12th weeks. [file 12868_2020_551_MOESM3_ESM.xlsx]

## Sheet: Sheet1
number	group	serum 5-HT(μg/L) 6 week	serum 5-HT(μg/L) 12 week	serum DA(μg/L) 6 week	serum DA(μg/L) 12 week	serum NE(μg/L) 6 week	serum NE(μg/L) 12 week	brain 5-HT(ng/g) 12 week	brain DA(ng/g) 12 week	brain NE(ng/g) 12 week
control 11	1	1581.64	854.21	3.44	5.24	0.37	0.36	29.81	2.4	0.17
control 12	1	1578.95	921.02	4.15	4.68	0.37	0.35	28.47	2.02	0.17
control 13	1	1473.91	1110.12	3.93	5.06	0.36	0.37	27.79	2.29	0.17
control 14	1	1585.09	1094.96	5.88	5.75	0.37	0.35	24.85	2.3	0.17
control 15	1	834.9	1251.34	4.07	4.67	0.36	0.37	27.77	2.17	0.17
control 16	1	735.48	1228.83	4.61	4.76	0.35	0.36	27	2.34	0.17
control 17	1	754.96	1883.53	4	4.94	0.37	0.3451	28.54	1.84	0.18
control 18	1	1795.91	1654.79	4.97	4.63	0.36	0.36	30.57	1.84	0.16
	average	1292.61	1249.85	4.38125	4.96625	0.36375	0.358137	28.1	2.15	0.17
	SD	438.539	353.381	0.758804	0.382471	0.00744024	0.0092138	1.74573	0.223671	0.00534522
CUMS 21	2	790.41	553.92	2.55	1.9	0.32	0.33	11.79	0.95	0.14
CUMS 22	2	396.63	455.37	1.14	1.58	0.33	0.33	13.91	0.63	0.14
CUMS 23	2	302.51	402.56	0.94	1.39	0.33	0.34	13.23	0.7	0.14
CUMS 24	2	784.29	348.83	1.95	1.49	0.32	0.34	11.72	0.72	0.14
CUMS 25	2	430.8	540.57	1.78	1.96	0.33	0.33	16.55	0.83	0.14
CUMS 26	2	282.59	432.95	1.2	1.82	0.33	0.33	15.95	0.87	0.14
CUMS 27	2	792.7	499.82	1.79	1.23	0.34	0.32	14.04	0.75	0.14
CUMS 28	2	612.86	409.64	1.82	1.6	0.34	0.33	8.3	0.61	0.14
	average	549.099	455.457	1.64625	1.62125	0.33	0.33125	13.1862	0.7575	0.14
	SD	222.334	71.3947	0.525355	0.255759	0.00755929	0.0064087	2.62359	0.118171	0
CUMS+FA 31	3	448.16	552.12	1.65	2.32	0.32	0.35	20.1	1.08	0.15
CUMS+FA 32	3	670.7	442.87	2.17	2.34	0.33	0.34	25.69	1.48	0.15
CUMS+FA 33	3	515.91	795.21	2.06	2.25	0.34	0.34	15.17	1.27	0.15
CUMS+FA 34	3	699.55	574.41	1.79	2.04	0.32	0.35	16.64	1.13	0.15
CUMS+FA 35	3	308.09	604.29	1.22	2.73	0.32	0.34	12.61	1.22	0.14
CUMS+FA 36	3	508.11	698	2.42	2.33	0.33	0.35	11.54	1.23	0.15
CUMS+FA 37	3	274.27	545.69	1	2.75	0.33	0.35	11.24	0.86	0.15
CUMS+FA 38	3	547.74	410.82	2.1	1.93	0.33	0.35	25.13	1.35	0.15
	average	496.566	577.926	1.80125	2.33625	0.3275	0.34625	17.265	1.2025	0.14875
	SD	152.096	125.475	0.48959	0.289529	0.00707107	0.00517549	5.81133	0.185915	0.00353553
CUMS+CIT 41	4	573	1391.28	1.92	4.71	0.31	0.36	33	1.95	0.17
CUMS+CIT 42	4	472.24	1029.59	2.05	3.56	0.32	0.37	32.12	2.34	0.16
CUMS+CIT 43	4	347.75	1498.41	1.61	4.09	0.32	0.38	24.26	2.42	0.16
CUMS+CIT 44	4	455.48	886.53	1.28	5.49	0.33	0.38	28.05	2.01	0.16
CUMS+CIT 45	4	638.41	1438.18	1.84	3.61	0.34	0.35	26.36	2.33	0.17
CUMS+CIT 46	4	465.64	1014.26	2.16	4.01	0.32	0.35	29.71	2.06	0.16
CUMS+CIT 47	4	633.31	1179.84	2.35	4.62	0.33	0.36	27.92	2.01	0.17
CUMS+CIT 48	4	292.39	1380.63	1.65	3.82	0.31	0.36	23.08	2.04	0.16
	average	484.777	1227.34	1.8575	4.23875	0.3225	0.36375	28.0625	2.145	0.16375
	SD	125.709	230.286	0.340829	0.658883	0.010351	0.0118773	3.5002	0.185395	0.00517549
