# Supplementary material for: Folic acid ameliorates depression-like behaviour in a rat model of chronic unpredictable mild stress
Source: BMC Neurosci. 2020 Jan 15;21:1. doi: 10.1186/s12868-020-0551-3 (PMC6961331; doi:10.1186/s12868-020-0551-3)
Supplement: Supplementary file 4 — Additional file 4. Data for Fig. 5. The levels of IL-6, BDNF and β-EP in serum and brains of CUMS rats in different group during the experiment. [file 12868_2020_551_MOESM4_ESM.xlsx]

## Sheet: Sheet1
number	group	serum IL-6(pg/mL) 0 week	serum IL-6(pg/mL) 6 week	serum IL-6(pg/mL) 12 week	serum BDNF(ng/mL) 0 week	serum BDNF(ng/mL) 6 week	serum BDNF(ng/mL) 12 week	serum β-EP(pg/mL) 0 week	serum β-EP(pg/mL) 6 week	serum β-EP(pg/mL)12 week	brain IL-6(ng/g) 12 week	brain BDNF(ng/g) 12 week	brain β-EP(ng/g) 12 week
control 11	1	5.63	5.44	7.49	0.74	0.648	0.701	823.53	770.3	806.87	89.88	308.16	67.54
control 12	1	5.91	5.31	7.32	0.81	0.823	0.798	872.24	821.52	744.14	86.62	303.24	67.01
control 13	1	9.13	4.73	6.99	0.62	0.672	0.619	955.35	950.38	920.83	83.88	235.22	75.74
control 14	1	8.05	8.37	10.3	0.73	0.732	0.747	806.08	885.17	867.64	107.66	270.86	77.3
control 15	1	4.82	5.7	7.98	0.58	0.612	0.526	778.32	786.72	797.56	95.76	230.88	69.49
control 16	1	5.38	4.05	8.05	0.6	0.533	0.553	949.05	990.88	971.51	97.62	210.14	80.96
control 17	1	4.59	6.61	8.43	0.9	0.822	0.843	1022.33	1097.73	951.56	101.16	302.34	79.3
control 18	1	9.66	8.46	8.46	0.52	0.569	0.646	832.86	893.84	866.85	101.52	245.48	73.24
	average	6.64625	6.08375	8.1275	0.6875	0.676375	0.679125	879.97	899.567	865.87	95.5125	263.29	73.8225
	SD	1.99871	1.61597	1.02134	0.129035	0.108795	0.113477	86.1706	110.818	79.7252	8.16058	38.1201	5.36798
CUMS 21	2	6.94	10.13	15.83	0.71	0.218	0.259	1016.2	686.93	497.33	200.96	145.69	41.44
CUMS 22	2	10.5	21.16	21.32	0.68	0.303	0.254	649.55	419.18	447.56	245.84	147.32	39.3
CUMS 23	2	7.99	11.44	17.21	0.87	0.239	0.248	933.59	675.03	378.53	216.52	140.84	33.54
CUMS 24	2	8.52	19.99	19.99	0.72	0.368	0.226	847.78	560.83	360.97	239.88	139.08	37.79
CUMS 25	2	5.8	18.21	21	0.73	0.231	0.225	990.02	671.11	584	255.01	140.52	45.01
CUMS 26	2	8.73	13.31	16.93	0.77	0.322	0.348	775.82	515.98	538.8	230.16	201.84	44.9
CUMS 27	2	5.99	10.53	17.73	0.6	0.343	0.232	919.02	649.57	621.97	207.76	155.23	51.83
CUMS 28	2	9.41	15.36	20.55	0.59	0.401	0.373	740.22	466.13	428.87	247.36	197.34	35.74
	average	7.985	15.0162	18.82	0.70875	0.303125	0.270625	859.025	580.595	482.254	230.436	158.482	41.1938
	SD	1.64939	4.35078	2.12659	0.090307	0.0679231	0.0572661	128.767	104.812	94.7324	19.9769	25.9091	5.91591
CUMS+FA 31	3	7.28	20.7	14.12	0.62	0.341	0.371	957.82	645.69	674.32	217.44	166.18	56.19
CUMS+FA 32	3	8.45	16.05	15.22	0.71	0.262	0.314	814.9	590.33	651.25	200.32	170.12	54.27
CUMS+FA 33	3	5.6	16.42	16.83	0.65	0.372	0.558	631.83	431.29	510.67	201.96	199.64	42.56
CUMS+FA 34	3	9.78	15.95	16.02	0.73	0.406	0.396	896.09	553.21	449.72	192.24	184.53	37.48
CUMS+FA 35	3	4.03	9.46	15.55	0.81	0.316	0.355	897.28	500.11	532.11	180.6	205.9	44.34
CUMS+FA 36	3	3.04	10.61	16.72	0.62	0.308	0.387	716.36	476.57	500.57	200.64	176.9	42.71
CUMS+FA 37	3	4.41	12.79	12.32	0.7	0.463	0.376	859	612.39	405.18	207.84	174.59	38.9
CUMS+FA 38	3	4.54	11.58	17.99	0.54	0.329	0.422	778.78	620.9	600.32	215.88	197.32	50.03
	average	5.89125	14.195	15.5962	0.6725	0.349625	0.397375	819.008	553.811	540.518	202.115	184.398	45.81
	SD	2.36935	3.7392	1.76277	0.0827647	0.0627624	0.0721267	107	77.0617	94.762	12.0886	14.8796	6.93433
CUMS+CIT 41	4	4.25	17.07	8.75	0.56	0.206	0.958	992.03	609.3	892.25	105	363.04	90.02
CUMS+CIT 42	4	7.43	16.1	11.32	0.49	0.228	1	830.95	597.31	993.32	113.38	307.99	82.78
CUMS+CIT 43	4	5.48	12.69	9.73	0.71	0.298	0.858	933.85	631.78	795.82	116.76	327.04	67.32
CUMS+CIT 44	4	2.42	8.44	8.75	0.56	0.322	0.742	774.49	604.98	790.85	105	300.91	69.9
CUMS+CIT 45	4	11.74	20.75	10.33	0.75	0.313	0.799	633.42	548.91	857.72	107.83	270.83	59.81
CUMS+CIT 46	4	7.71	16.05	10.21	0.77	0.38	0.877	844.41	500.59	799.25	115.71	313.09	66.6
CUMS+CIT 47	4	7.92	11.8	9.55	0.73	0.319	0.778	784.36	526.31	780.13	114.6	315.72	65.01
CUMS+CIT 48	4	10.69	14.02	8.96	0.84	0.329	0.995	731.88	571.19	757.88	97.78	342.13	67.16
	average	7.205	14.615	9.7	0.67625	0.299375	0.875875	815.674	573.796	833.403	109.507	317.594	71.075
	SD	3.1198	3.7425	0.898999	0.123513	0.0564116	0.100053	112.783	45.3371	77.9736	6.68669	27.6143	10.0743
